# Supplementary material
Source: PubMed Central journal article supplement (PMC6522280)
Supplement: NIHMS1521521-supplement-2.pdf [file NIHMS1521521-supplement-2.pdf]

Fig S1

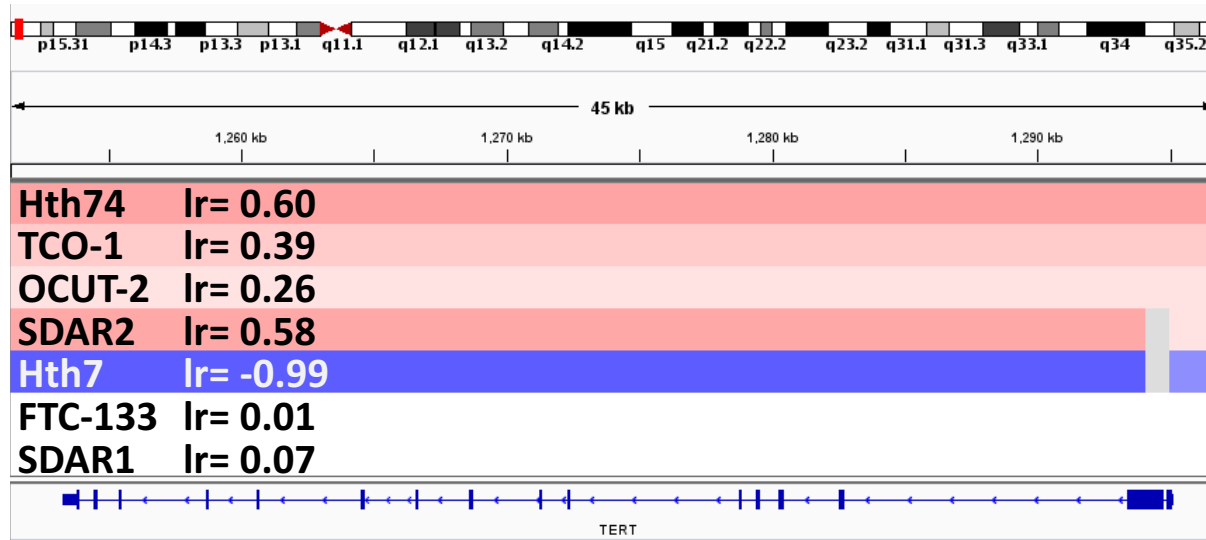

Fig S2

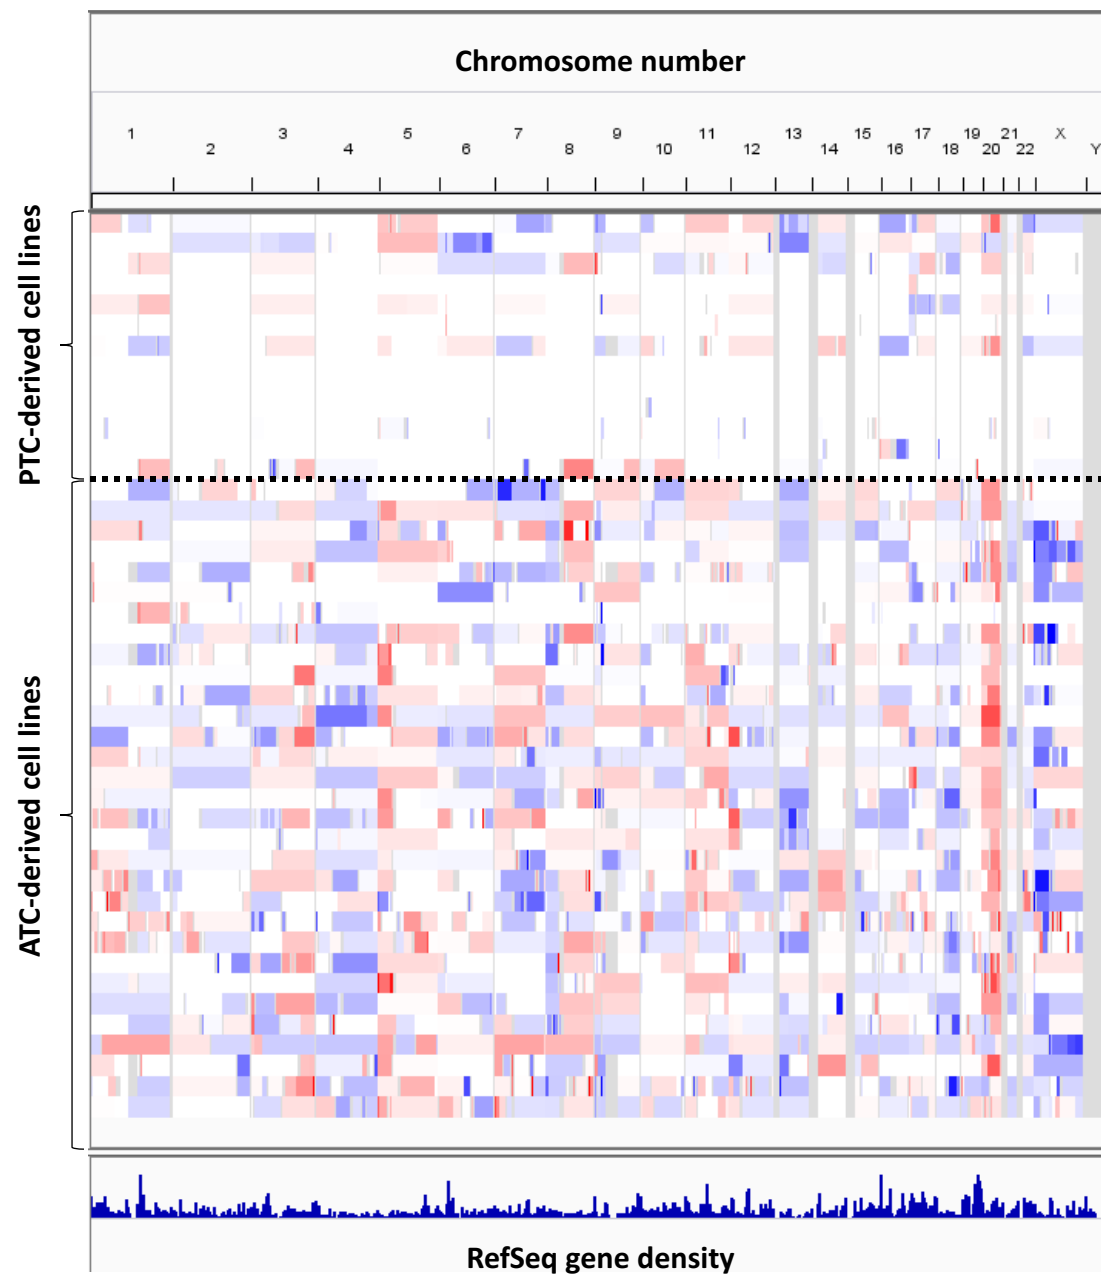

Fig S3

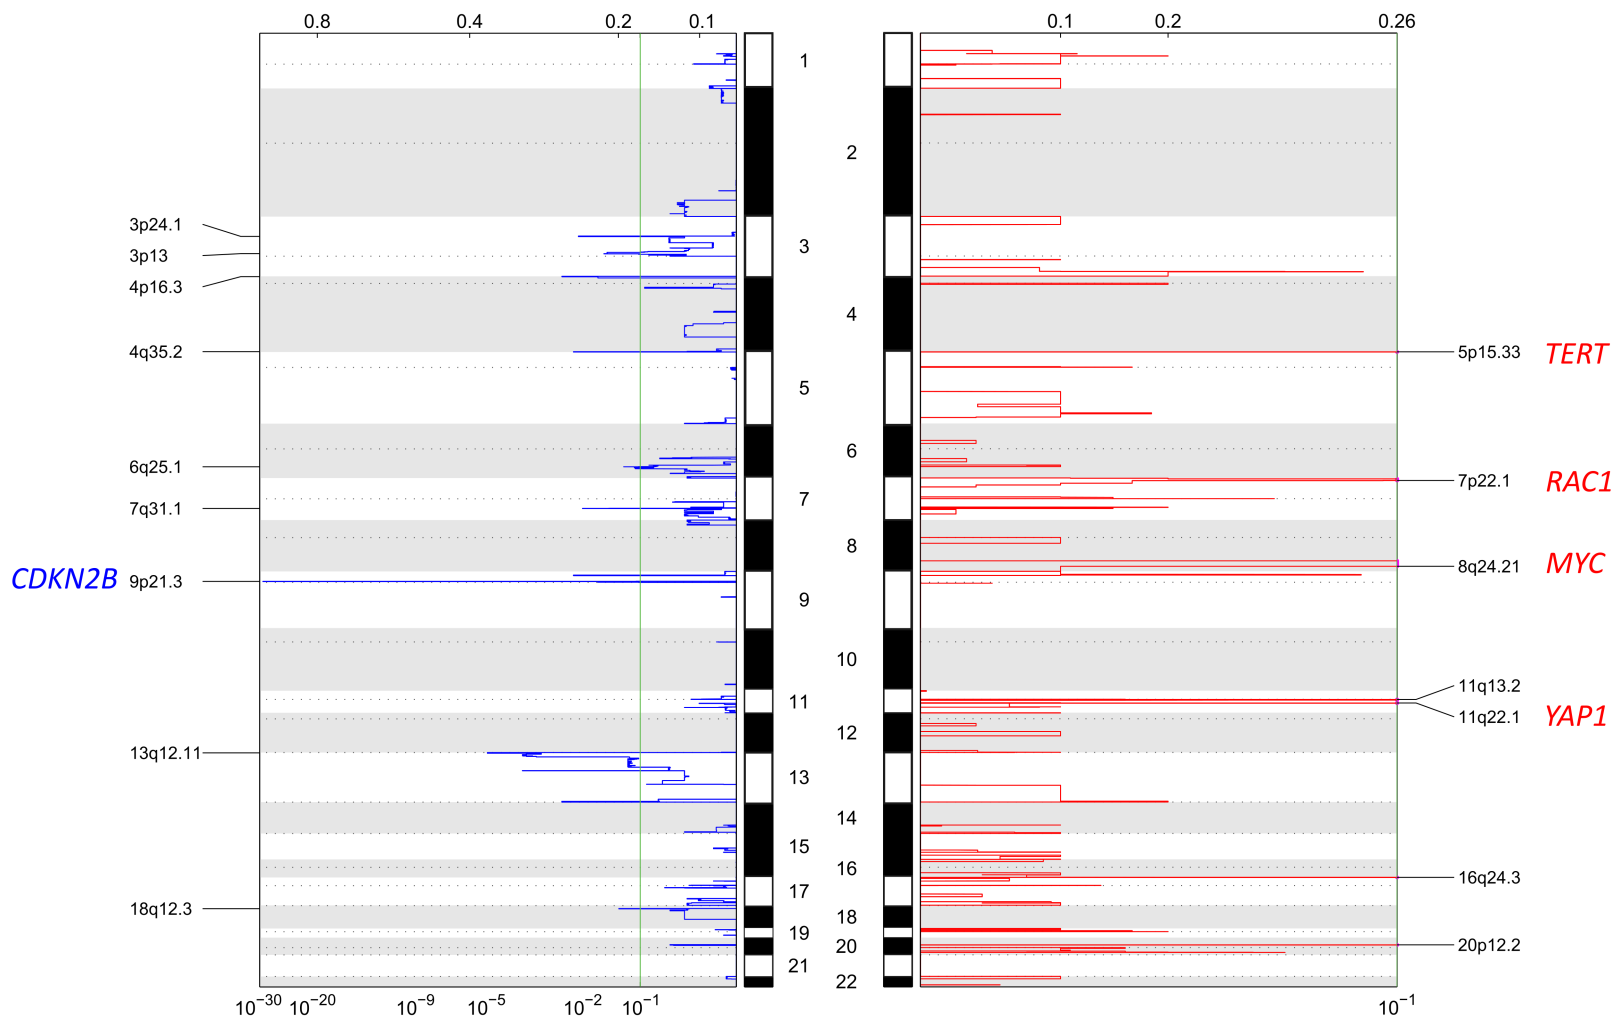

Fig S4

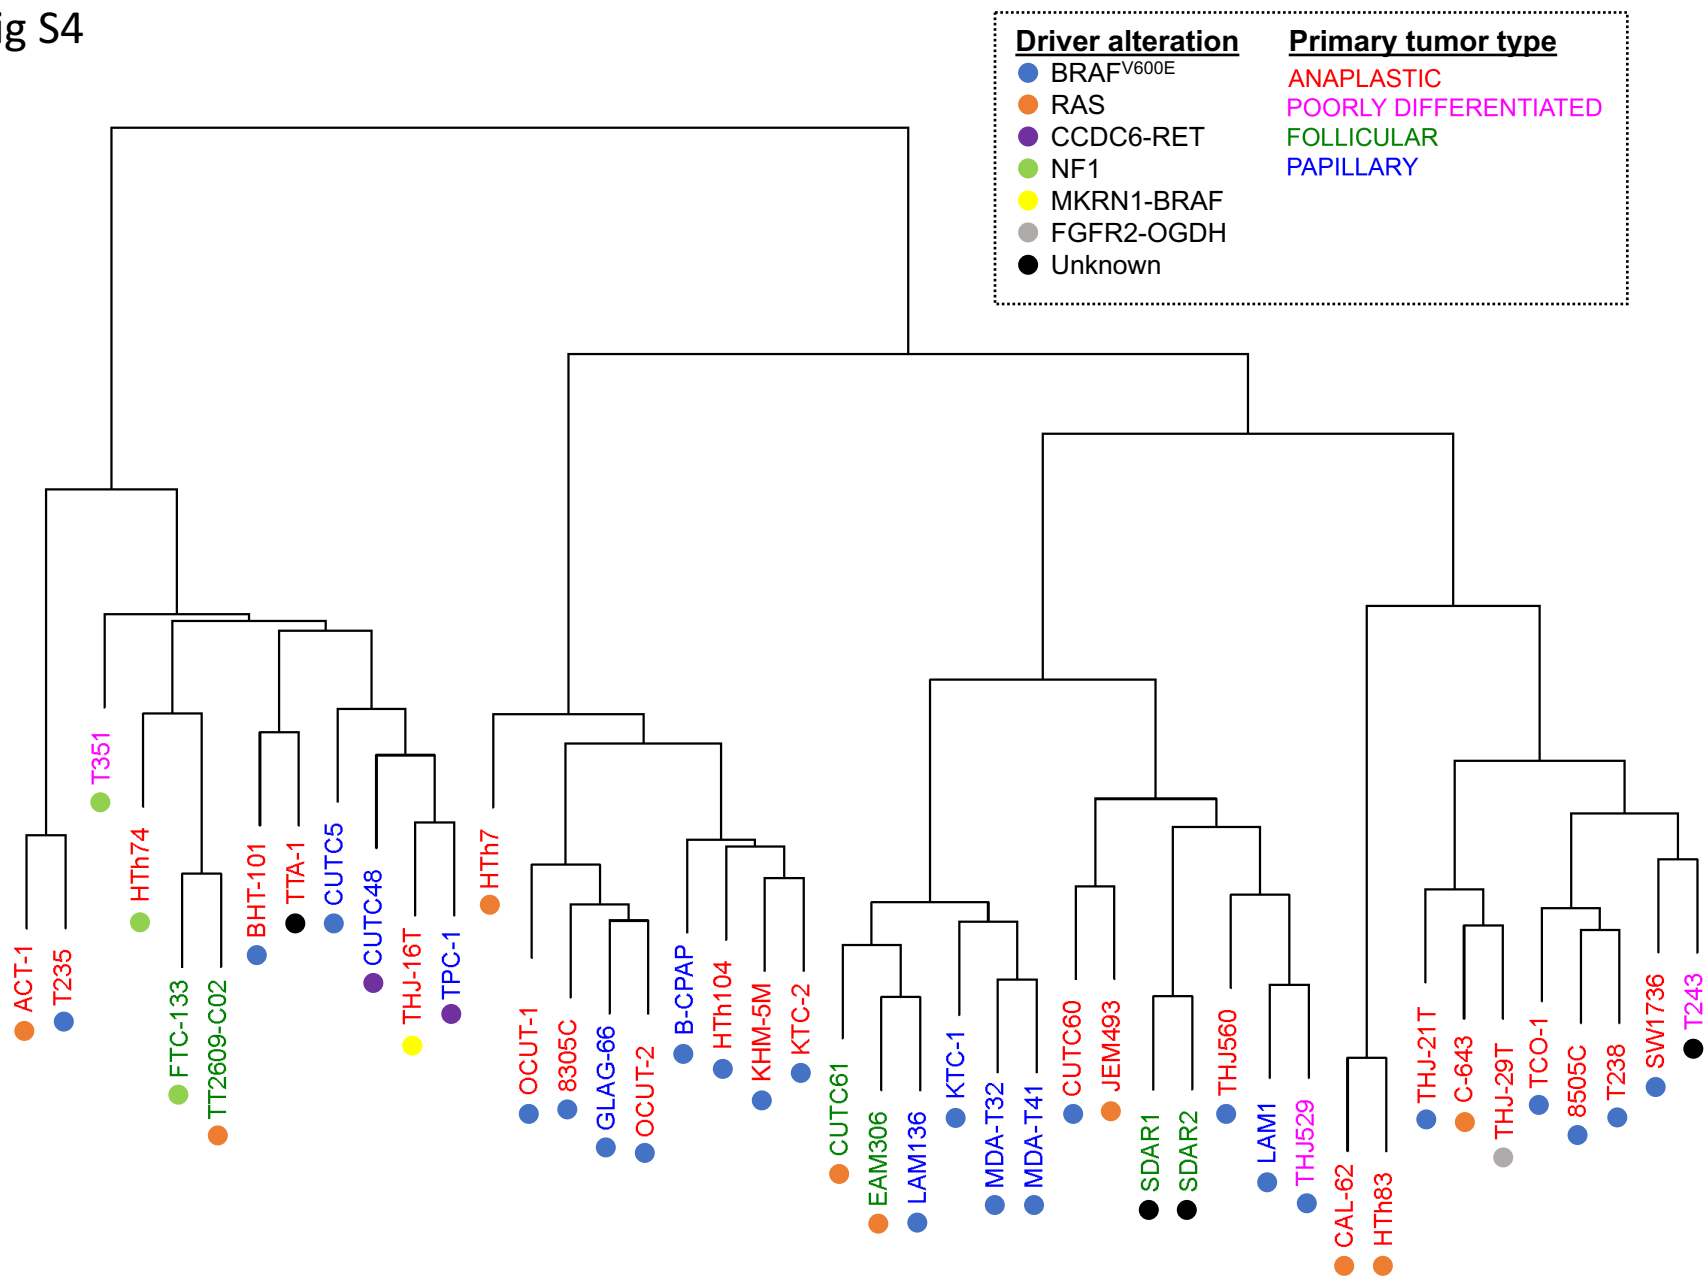

Fig S5

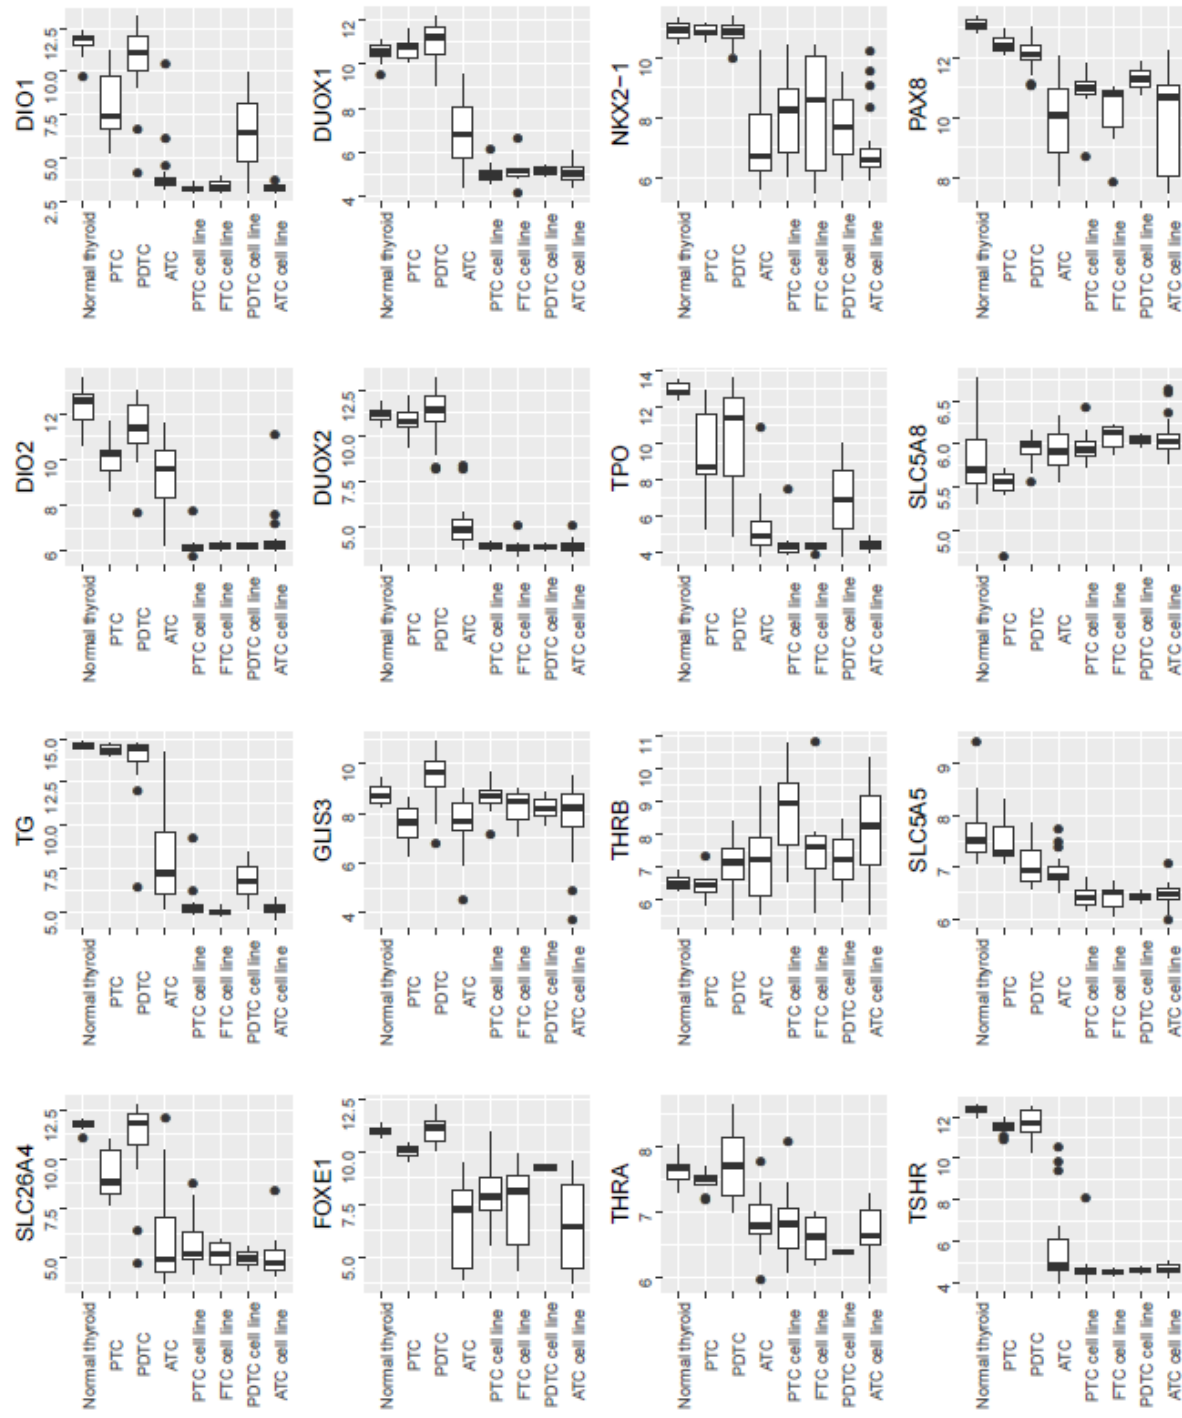

# Published vs calculated BRS from TCGA samples

Fig S6

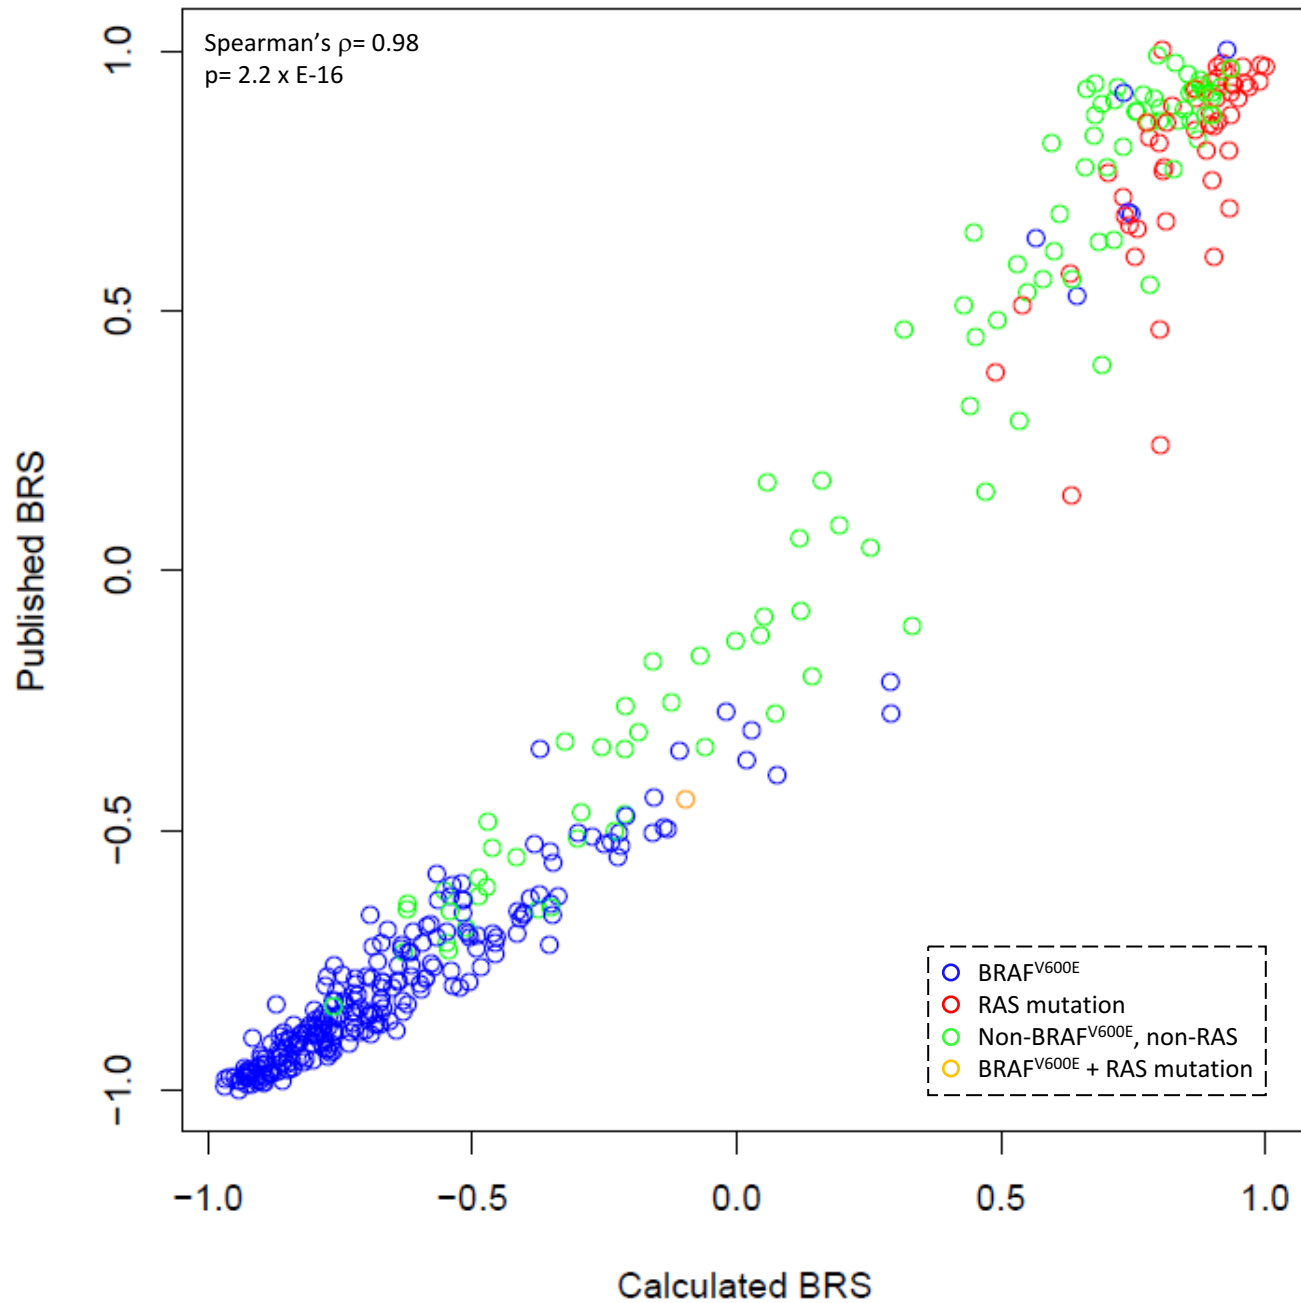

# CUTC5

A.

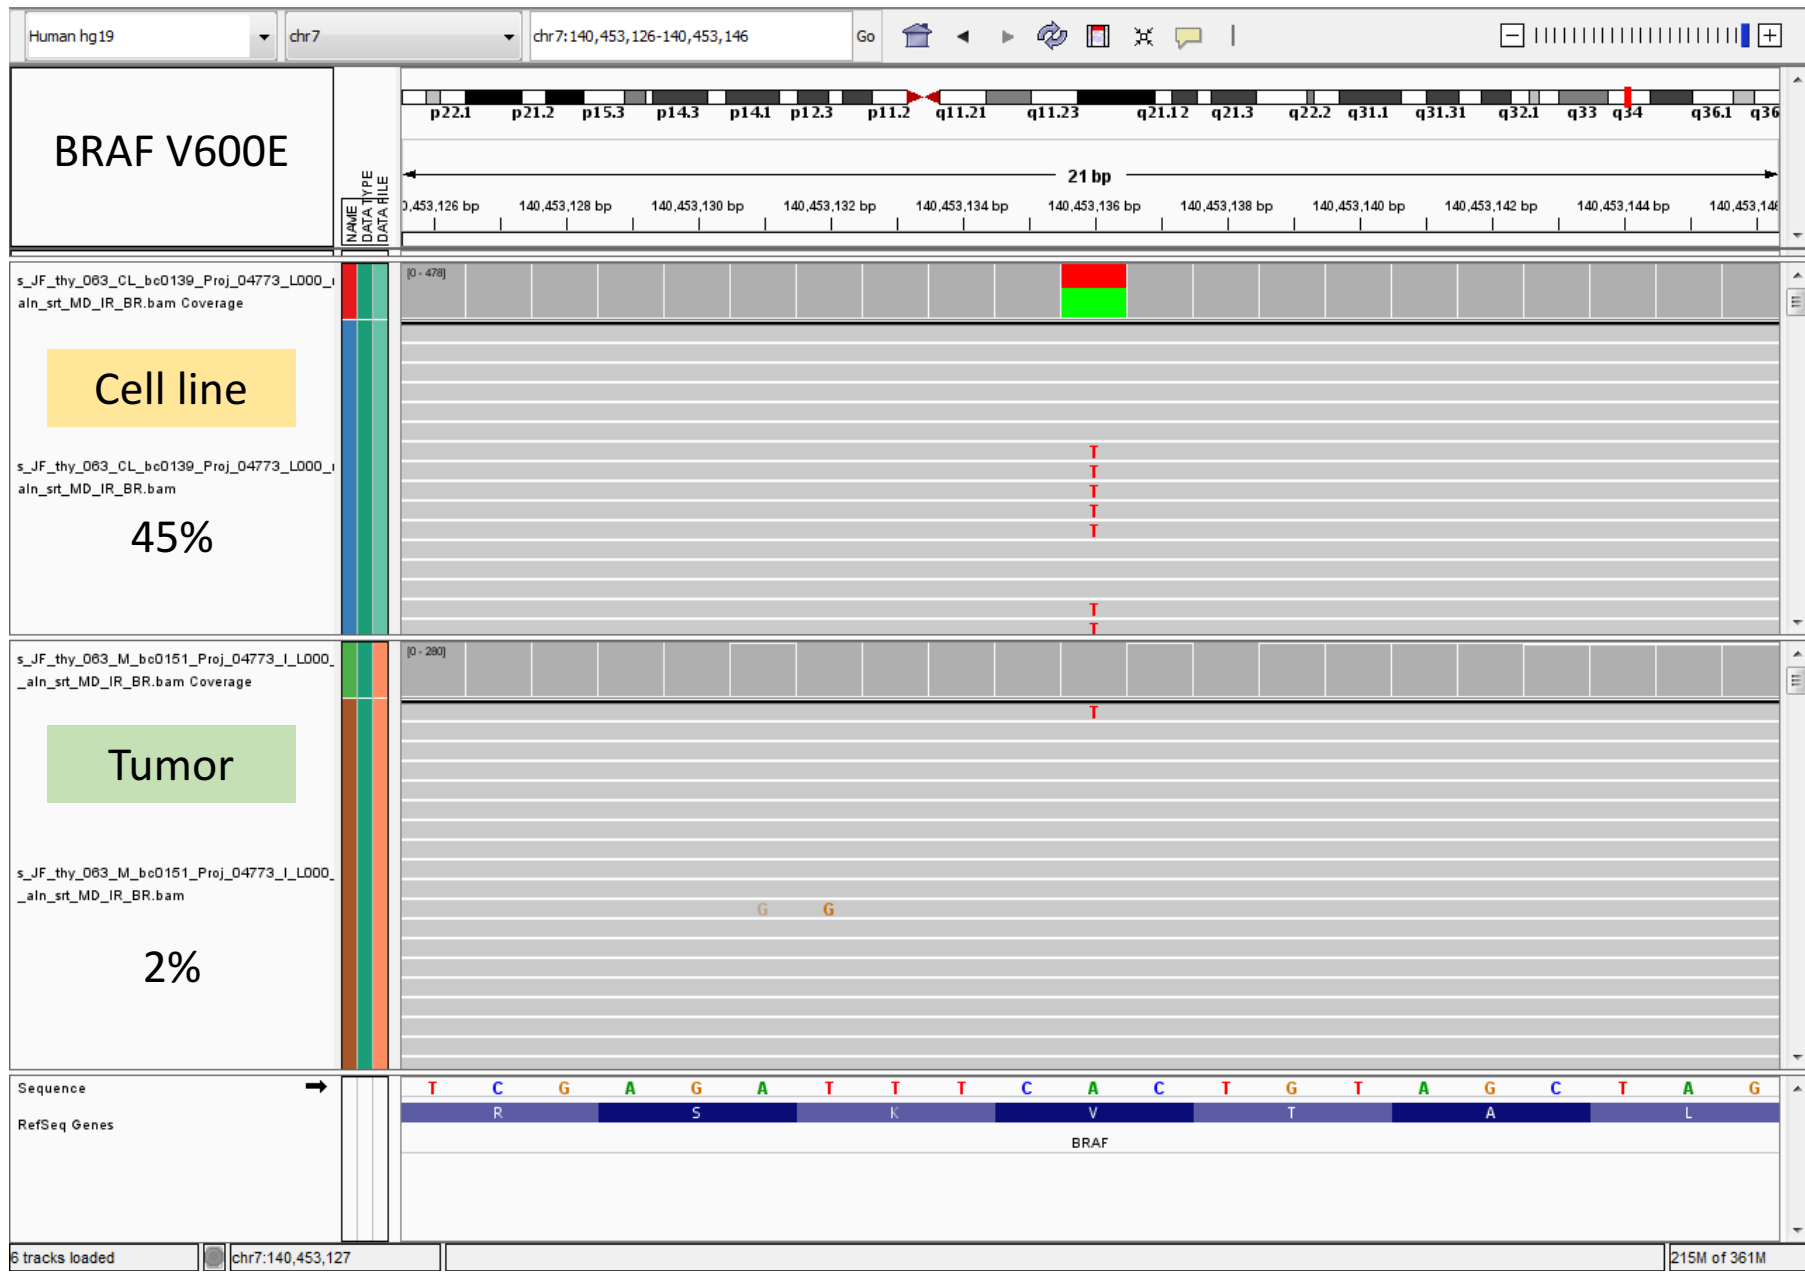

B.

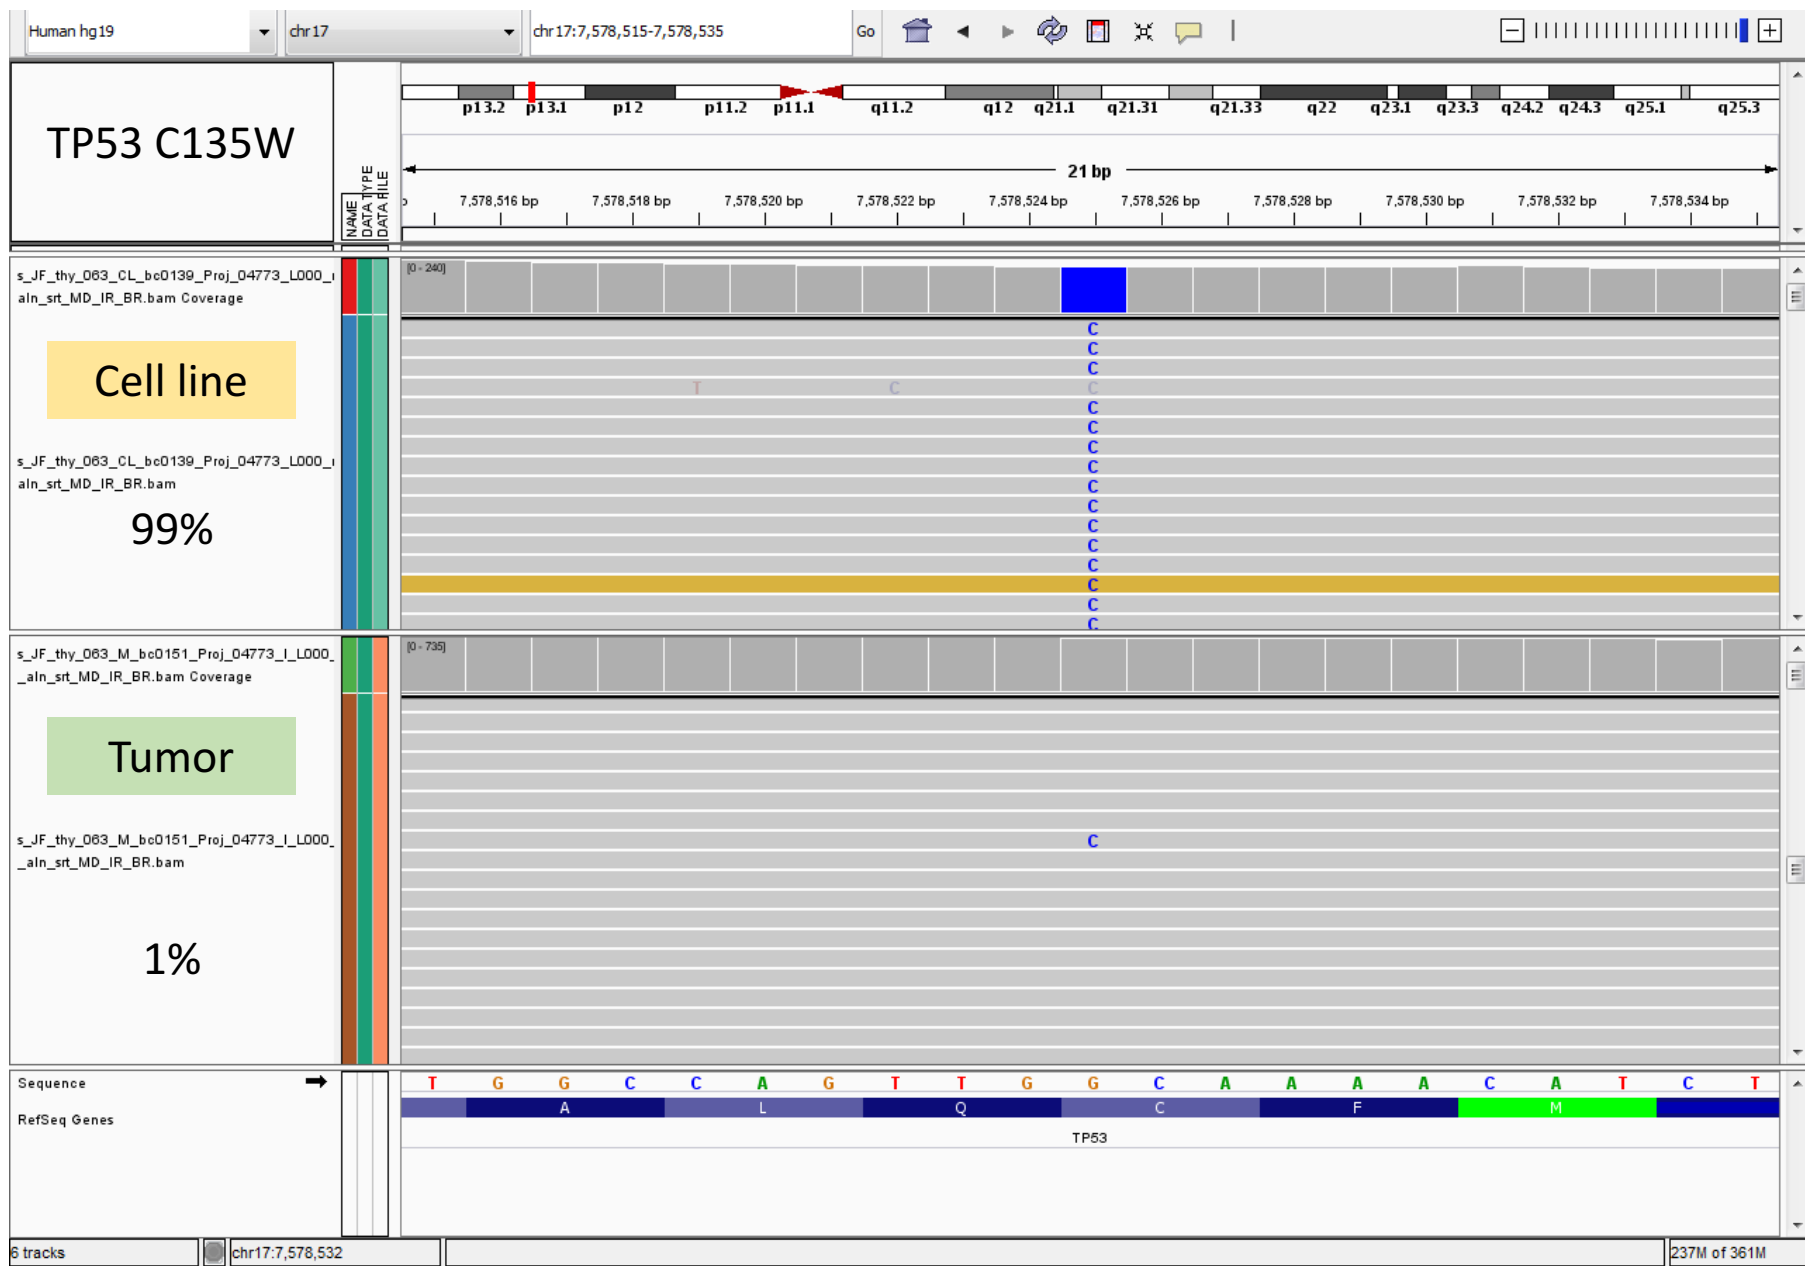

C.

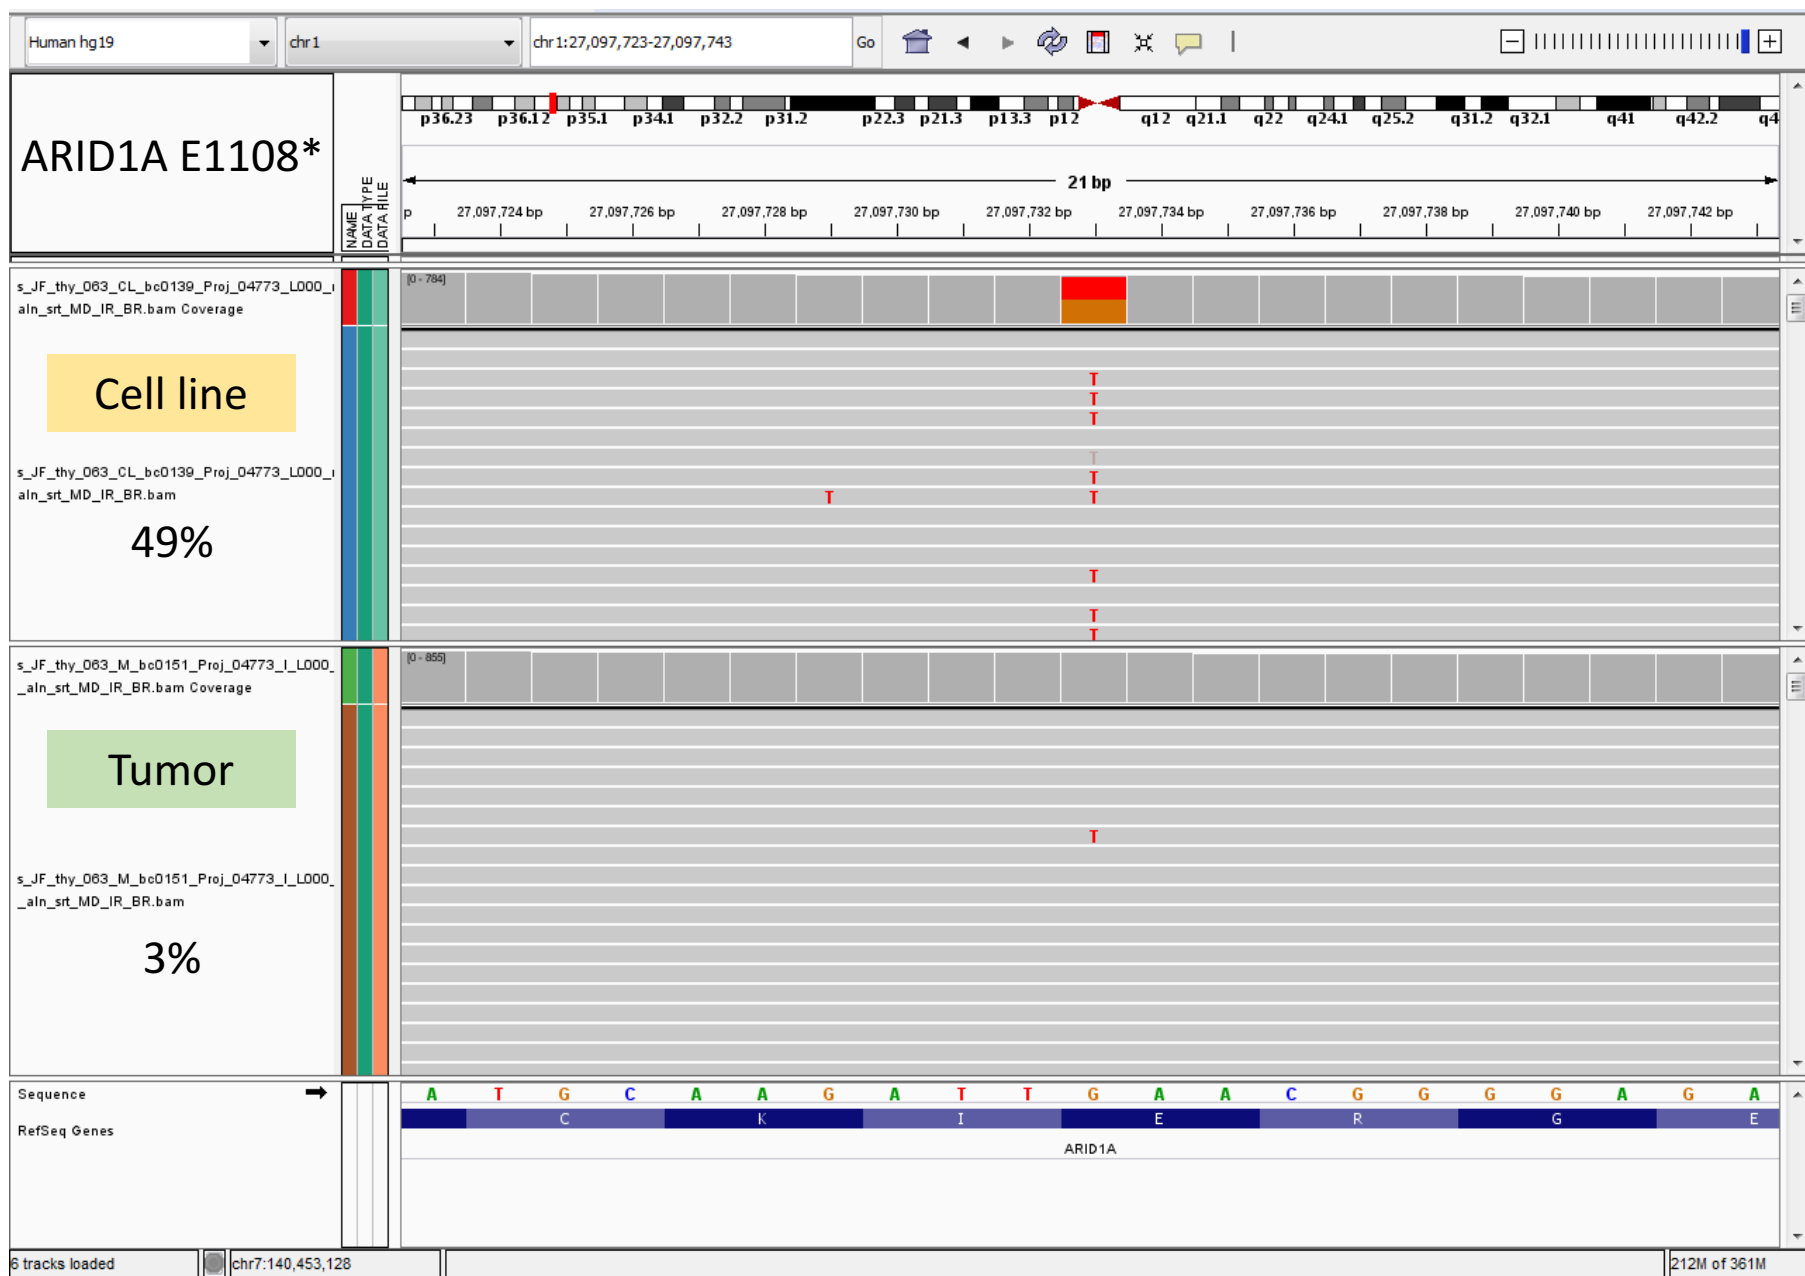

Fig S8

**A.** *TERT* promoter mutations

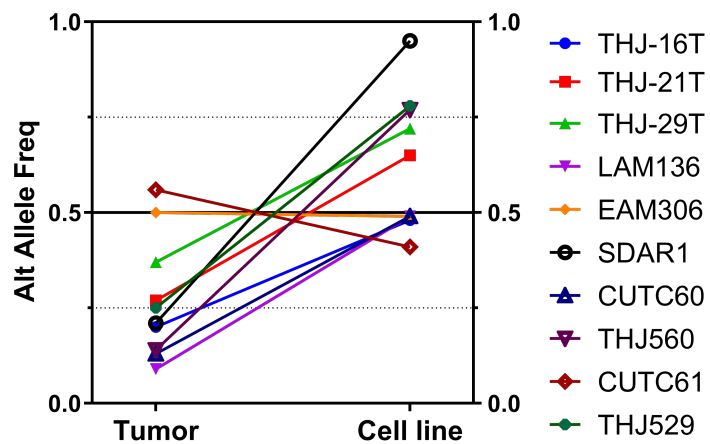

**B.** *TP53* mutations

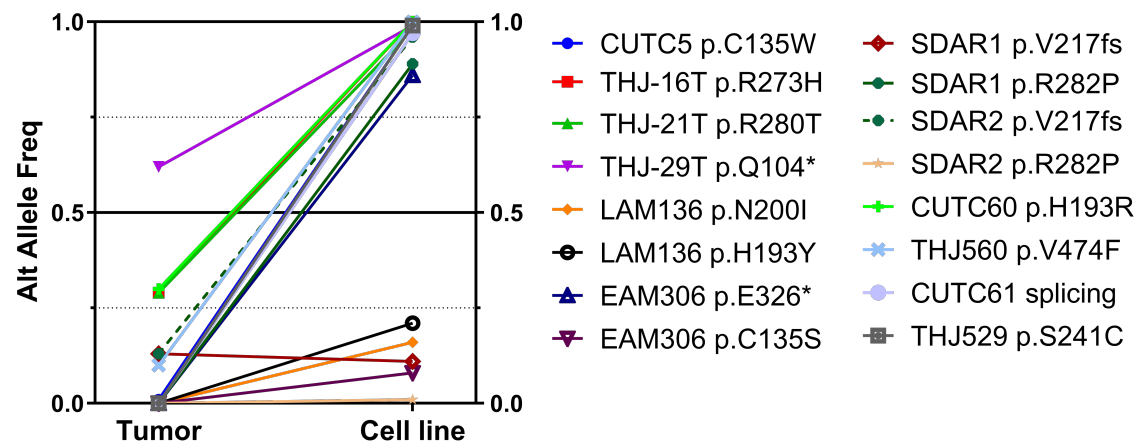



Fig S9

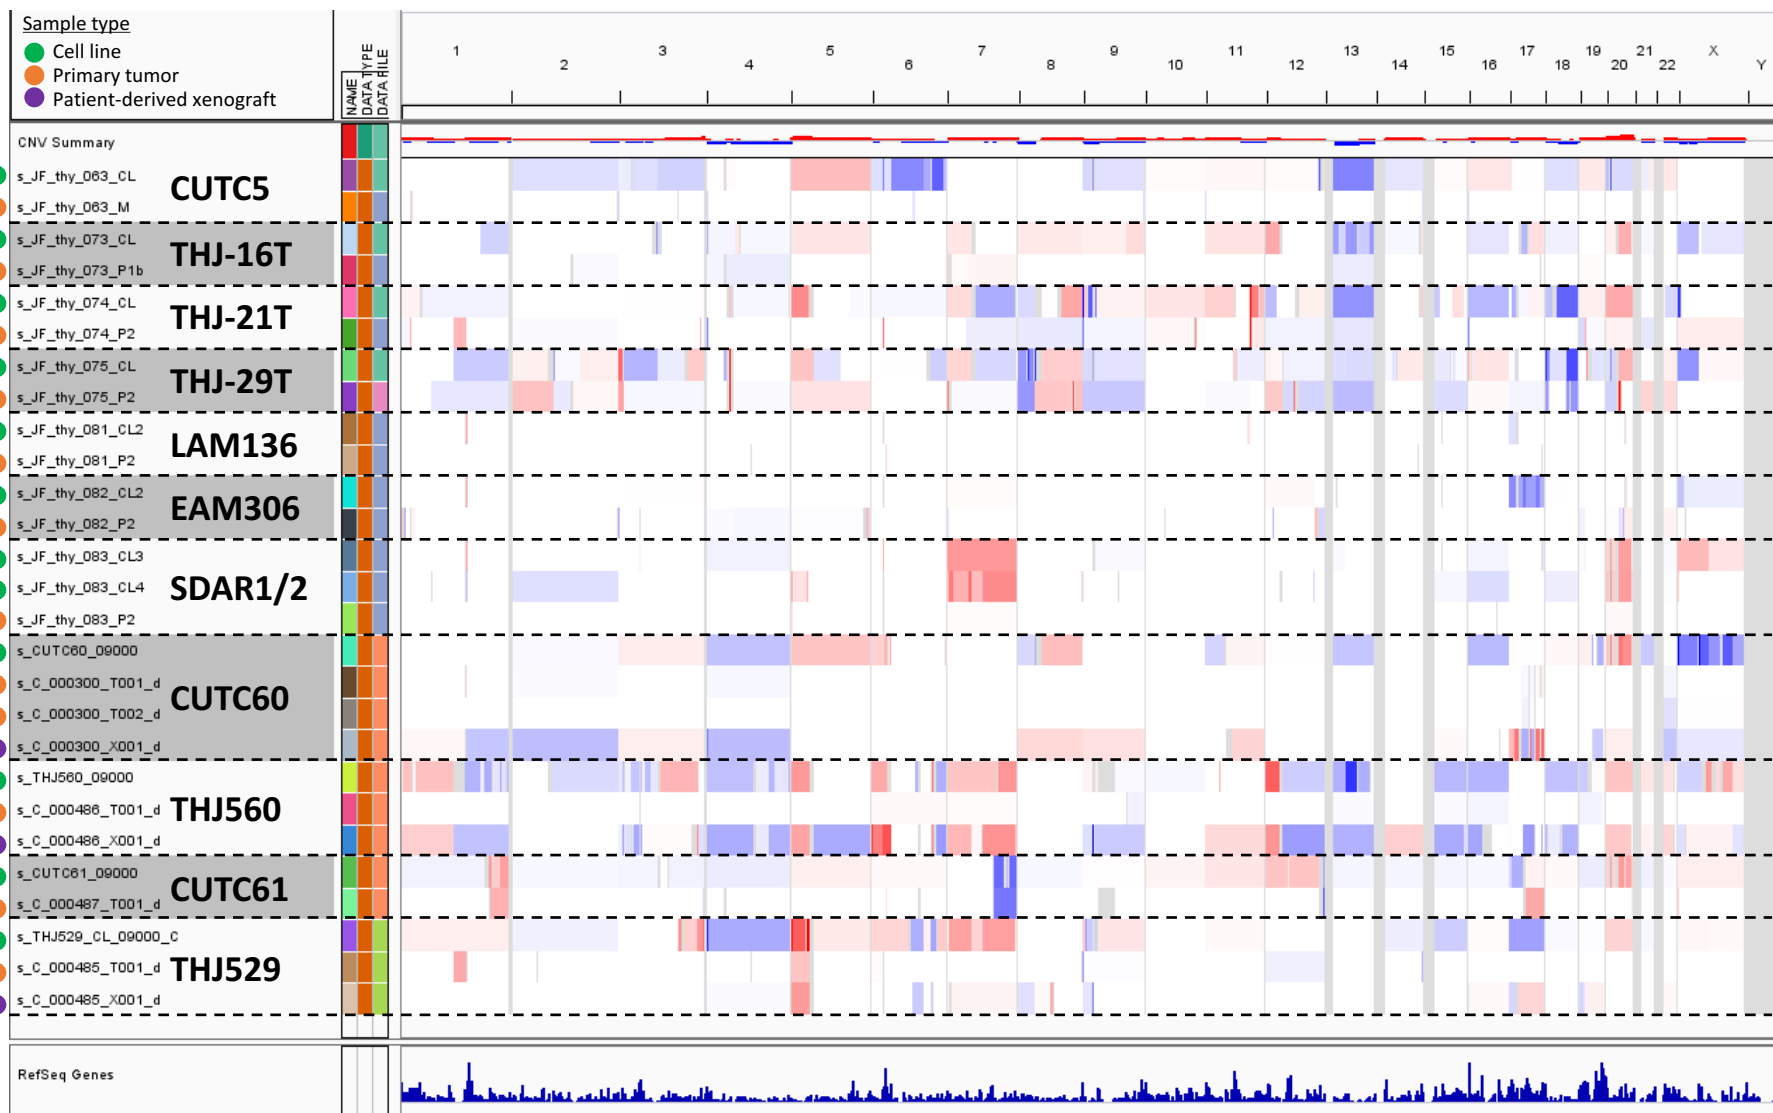

# THJ560

Fig S10

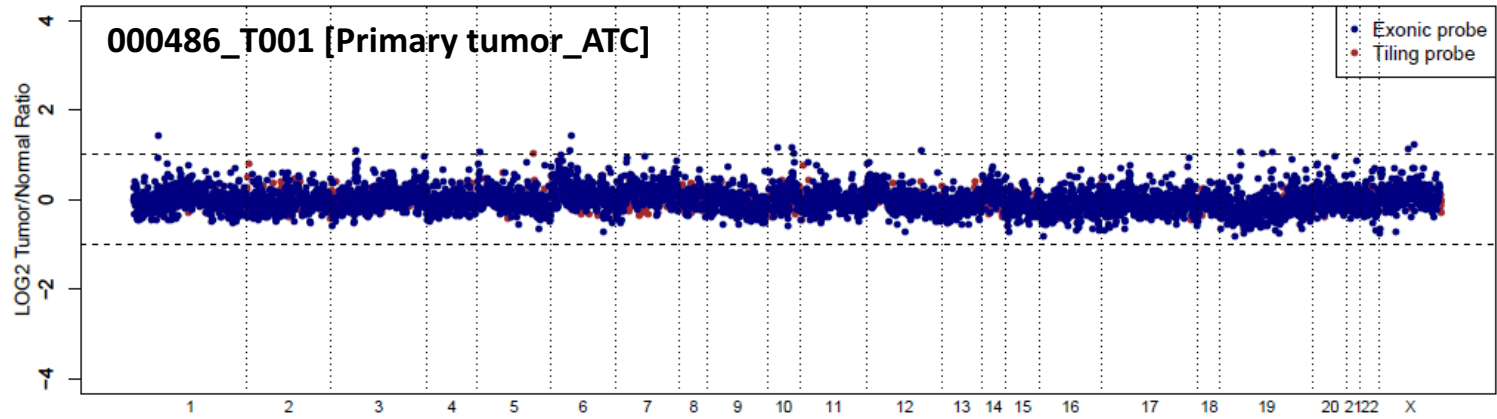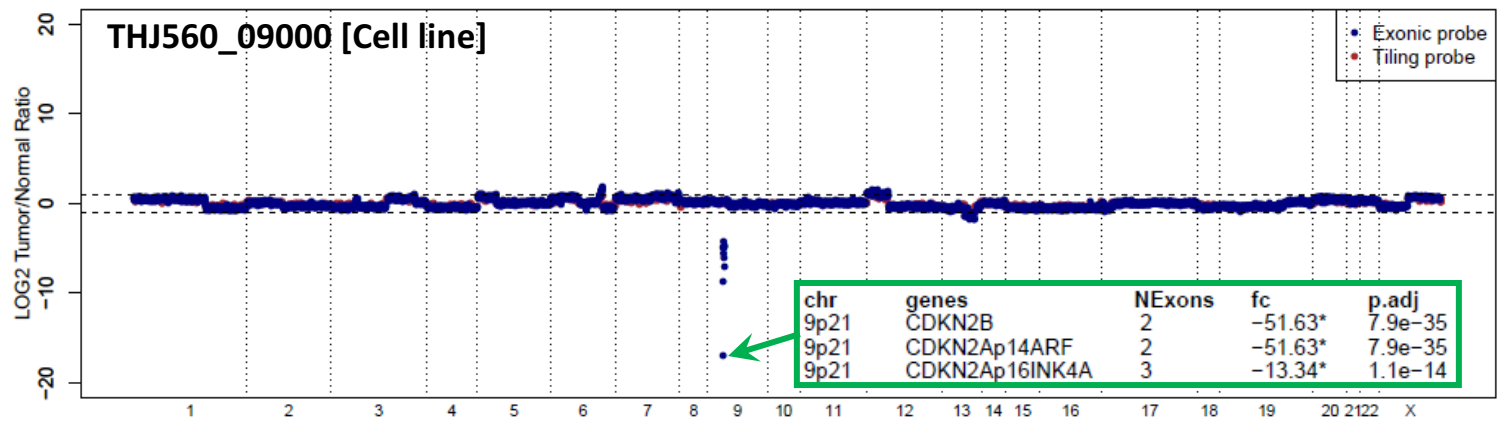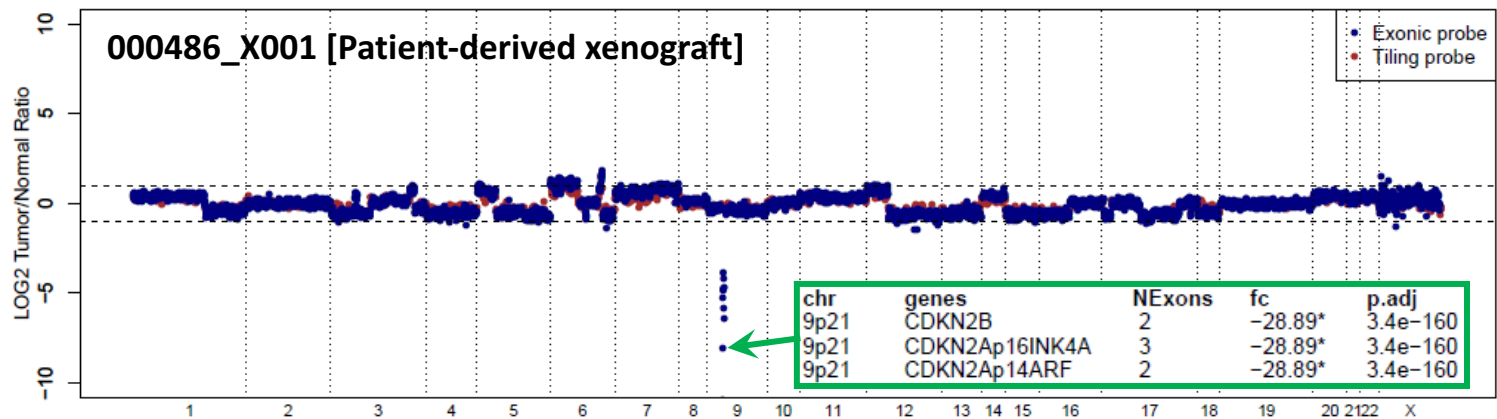

Targeted exons per chromosome
